# Supplementary material
Source: PubMed Central journal article supplement (PMC2964218)
Supplement: 1009269107_pnas.201009269SI.pdf [file 1009269107_pnas.201009269SI.pdf]

# Supporting Information

Ivanov et al. 10.1073/pnas.1009269107

Table S1. Oligonucleotides used in this study

| Number | Name                                | Sequence                                         |
|--------|-------------------------------------|--------------------------------------------------|
| 1      | AUU/S<br>AUU/A                      | GTAGGCCACCATTGCCG<br>GATCCGGCAATGGTGGCCTACTGCA   |
| 2      | UUG/S<br>UUG/A                      | GTAGGCCACCTTGCCG<br>GATCCGGCCAAGGTGGCCTACTGCA    |
| 3      | CUG/S<br>CUG/A                      | GTAGGCCACCCTGGCCG<br>GATCCGGCCAGGTGGCCTACTGCA    |
| 4      | AUC/S<br>AUC/A                      | GTAGGCCACCATGCCG<br>GATCCGGCGATGGTGGCCTACTGCA    |
| 5      | AUA/S<br>AUA/A                      | GTAGGCCACCATAGCCG<br>GATCCGGCTATGGTGGCCTACTGCA   |
| 6      | AAG/S<br>AAG/A                      | GTAGGCCACCAAGGCCG<br>GATCCGGCCTTGGTGGCCTACTGCA   |
| 7      | AGG/S<br>AGG/A                      | GTAGGCCACCAGGCCG<br>GATCCGGCCCTGGTGGCCTACTGCA    |
| 8      | ACG/S<br>ACG/A                      | GTAGGCCACCAGGCCG<br>GATCCGGCCGTGGTGGCCTACTGCA    |
| 9      | GUG/S<br>GUG/A                      | GTAGGCCACCGTGGCCG<br>GATCCGGCCACGGTGGCCTACTGCA   |
| 10     | GG/S<br>GG/A                        | GTAGGCCGCCATGGCCG<br>GATCCGGCCATGGCGCCTACTGCA    |
| 11     | CG/S<br>CG/A                        | GTAGGCCCCATGGCCG<br>GATCCGGCCATGGGGCCTACTGCA     |
| 12     | UG/S<br>UG/A                        | GTAGGCCTCCATGGCCG<br>GATCCGGCCATGGAGGCCTACTGCA   |
| 13     | AA/S<br>AA/A                        | GTAGGCCACCATGACCG<br>GATCCGGTCATGGTGGCCTACTGCA   |
| 14     | AC/S<br>AC/A                        | GTAGGCCACCATGCCG<br>GATCCGGGCATGGTGGCCTACTGCA    |
| 15     | AU/S<br>AU/A                        | GTAGGCCACCATGTCCG<br>GATCCGGACATGGTGGCCTACTGCA   |
| 16     | GA/S<br>GA/A                        | GTAGGCCGCCATGACCG<br>GATCCGGTCATGGCGCCTACTGCA    |
| 17     | GC/S<br>GC/A                        | GTAGGCCGCCATGCCG<br>GATCCGGGCATGGCGCCTACTGCA     |
| 18     | GU/S<br>GU/A                        | GTAGGCCGCCATGTCCG<br>GATCCGGACATGGCGCCTACTGCA    |
| 19     | CA/S<br>CA/A                        | GTAGGCCCCATGACCG<br>GATCCGGTCATGGGGCCTACTGCA     |
| 20     | CC/S<br>CC/A                        | GTAGGCCCCATGCCG<br>GATCCGGGCATGGGGCCTACTGCA      |
| 21     | CU/S<br>CU/A                        | GTAGGCCCCATGTCCG<br>GATCCGGACATGGGGCCTACTGCA     |
| 22     | UA/S<br>UA/A                        | GTAGGCCTCCATGACCG<br>GATCCGGTCATGGAGGCCTACTGCA   |
| 23     | UC/S<br>UC/A                        | GTAGGCCTCCATGCCG<br>GATCCGGGCATGGAGGCCTACTGCA    |
| 24     | UU/S<br>UU/A                        | GTAGGCCTCCATGTCCG<br>GATCCGGACATGGAGGCCTACTGCA   |
| 25     | AG/S<br>AG/A                        | GTAGGCCACCATGCCG<br>GATCCGGCCATGGTGGCCTACTGCA    |
| 26     | EIF1 S<br>EIF1 AS                   | GTAGTATGTATGTCCG<br>GATCCGGACATACGATACTACTGCA    |
| 27     | Neg Co S<br>Neg Co AS               | GTAGGCCACCACAGCCG<br>GATCCGGCTGTGGTGGCCTACTGCA   |
| 28     | pSV40-Renilla S<br>pSV40-Renilla AS | GATCCTAATAGCACGTGTAATT<br>CTAGAATTACACGTGCTATTAG |
| 29     | EIF1 WT S                           | CGCGCTAGCTAGTATCGTATGTCCGCTATCCAGAACCTCCAC       |
| 30     | EIF1 good S                         | CGCGCTAGCTAGGCCACCATGGCCGCTATCCAGAACCTCCAC       |
| 31     | EIF1 good* S                        | CGCGCTAGCTAGGCCACCATGTCCGCTATCCAGAACCTCCAC       |
| 32     | EIF1 AS1                            | CGTCTAGACACTTAAAACCCATGAACCTTCAGCTG              |

**Fig. S1.** Nucleotide sequences used for generating logograms: alignment of 18 nucleotides surrounding the AUG start codon of eIF1 from (A) metazoan species, (B) fungal species, (C) plant sequences excluding "eIF1 #2", and (D) plant sequences of "eIF1 #2." Species names are on the left. Nucleotide sequences from the corresponding eIF1 homolog are on the right. The initiation codon is highlighted in green. Nucleotides in positions -3/+4 are highlighted in red if they deviate from the Kozak consensus and in gray if they comply with it. A file with the full sequences is available upon request.

[Fig. S1](#)

**Fig. S2.** Consensus and eIF1 initiation contexts in seven different species. The consensus of initiation in different species was obtained from the Transterm database (1). The frequency of the occurrence of each nucleotide at each position is shown as a percentage of the total. The numbering, shown above, is relative to the "A" of the AUG codon. A consensus nucleotide occurring in more than 35% at a given position is highlighted in green. The nucleotides surrounding the start codon of the (main) eIF1 are highlighted as follows: magenta—those differing from the preferred consensus but occurring in more than 15% of other genes; red—those differing from the preferred consensus and occurring in less than 15% of other genes; yellow—those that coincide with the preferred consensus. (A) *Homo sapiens*, (B) *Drosophila melanogaster*, (C) *Neurospora crassa*, (D) *Toxoplasma gondii*, (E) *Oryza sativa*, (F) *Ustilago maydis*, and (G) *Saccharomyces cerevisiae*.

1. Jacobs GH, et al. (2009) Transterm: A database to aid the analysis of regulatory sequences in mRNAs. *Nucleic Acids Res* 37(Database issue):D72–D76.

[Fig. S2](#)

**Fig. S3.** Some plants have as many as three or even more paralogs of eIF1. Most of them are probably redundant, but one has a conservation pattern that suggests that it is not entirely redundant with the other(s). Because these eIF1 paralogs were not carefully classified before, we give them arbitrary numbers, 1–3, with each number corresponding to an orthologous group. For example, *Arabidopsis thaliana* paralogs 1–3 are currently annotated with gene IDs AT4G27130, AT5G54940, and AT1G54290. (A) A phylogenetic tree constructed with ClustalX from representative eIF1 protein sequences. The scale bar above represents the rate of divergence. The *Methanocaldococcus infernus* sequence is used to root the tree. Bootstrap values of key nodes are indicated. The branches linking paralogs of the plant "eIF1 #2" group are in red and those of the other paralogous groups are in green. As demonstrated by the branch lengths, plant "eIF1 #2" orthologs diverged from each other more quickly than did the other plant eIF1 paralogs and are therefore under more relaxed negative selection. For example, *A. thaliana* and *Raphanus sativus* paralogs #1 are 97% identical at the amino acid level and paralogs #3 are 98% identical, but paralogs #2 are only 90% identical, indicating that this paralog is diverging more quickly. This pattern of divergence is indicative of a nonredundant function for plant eIF1 paralog #2, which appears to be present only in some branches of flowering plants. (B) The protein sequences, in FASTA format, of the eIF1 homologs used to construct the tree shown in A. All plant eIF1 paralogs that do not belong to the group designated as #2 have their AUG initiation codon in a poor initiation context as shown in Fig. 1C. The 69 plant paralogs designated #2 for which sequence is available have an initiation consensus as shown in the logo in C and have an absolutely conserved +4 "G." Letter heights are proportional to the frequency of conservation. The consensus conservation is shown at the top of each logo; the position relative to the "A" of the AUG start codon is indicated below (crucial positions -3 and +4 are in red). Alignments of the sequences used to generate the logogram are shown in [Fig. S1D](#).

[Fig. S3](#)
